# Supplementary material for: Exploiting network analysis to create a novel sentinel surveillance system for efficient, rapid detection of emerging Clostridioides difficile strains in England
Source: Research Square preprint supplement (doi:10.21203/rs.3.rs-7140391/v1), 2025-08-04
Supplement: Supplementary file 1 [file 27d162d6d138fa5ea21145ed.docx]

# SUPPLEMENTARY FIGURES

| Supplementary Figure 1: | Distribution of estimated annual sequenced specimens supplied by 20‑member, optimised sentinel sets |
| --- | --- |
| Supplementary Figure 2: | Impact of restricting the number of teaching hospital groups on mean time to detection |
| Supplementary Figure 3: | Probability of detection within a month (cf monthly CDI cases per hospital group) |

| (a) 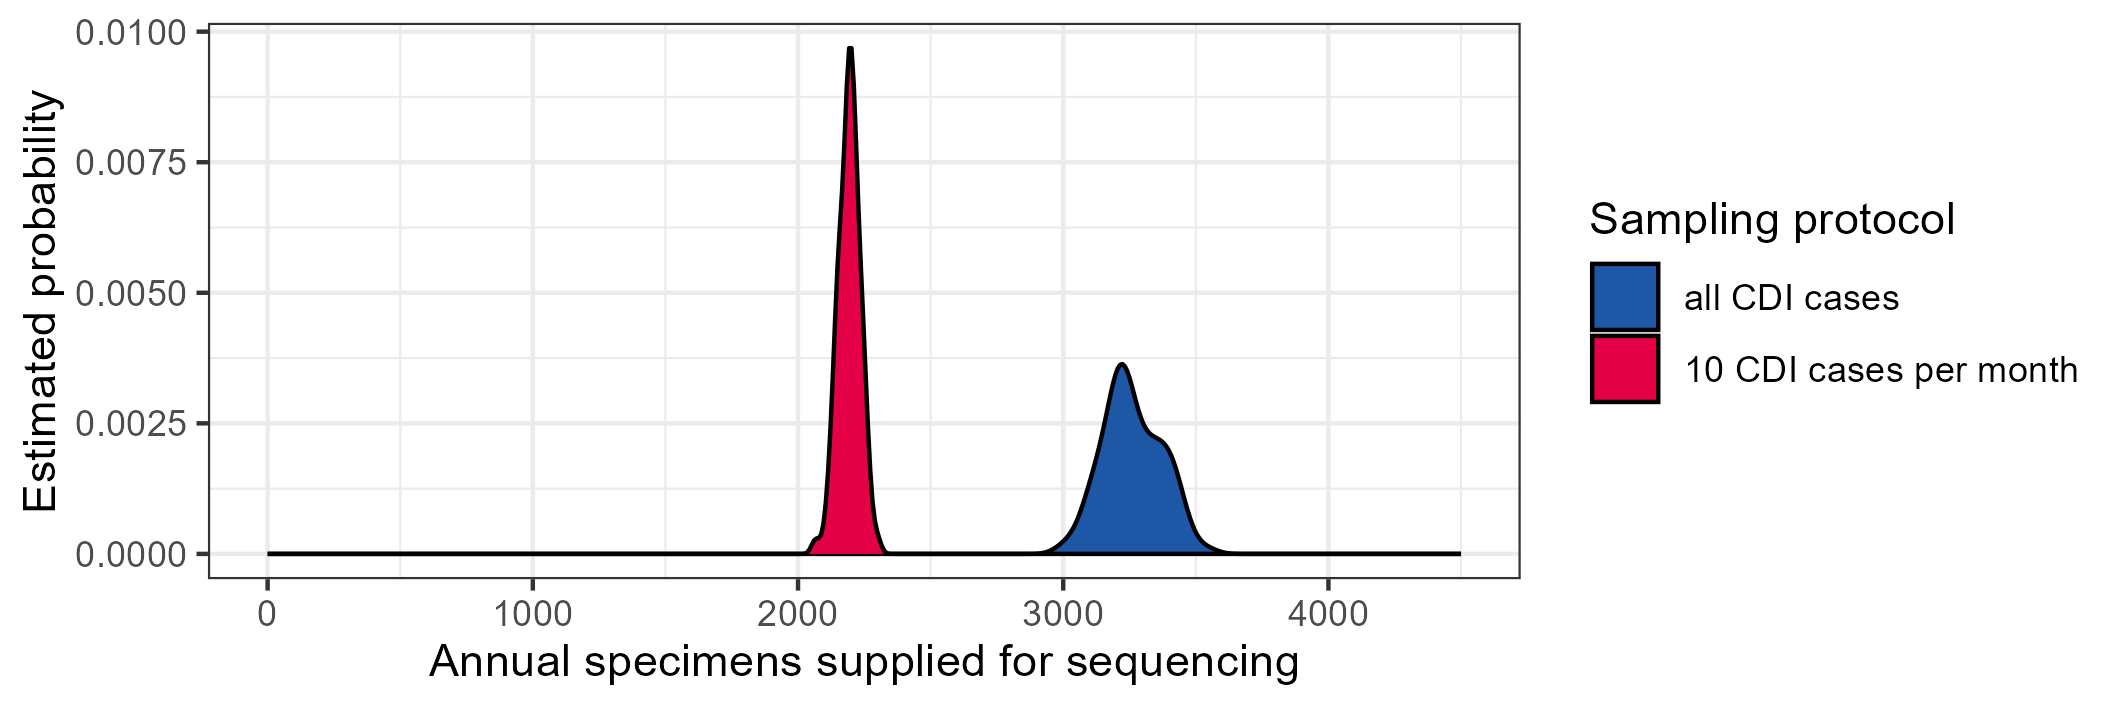 |
| --- |
| (b)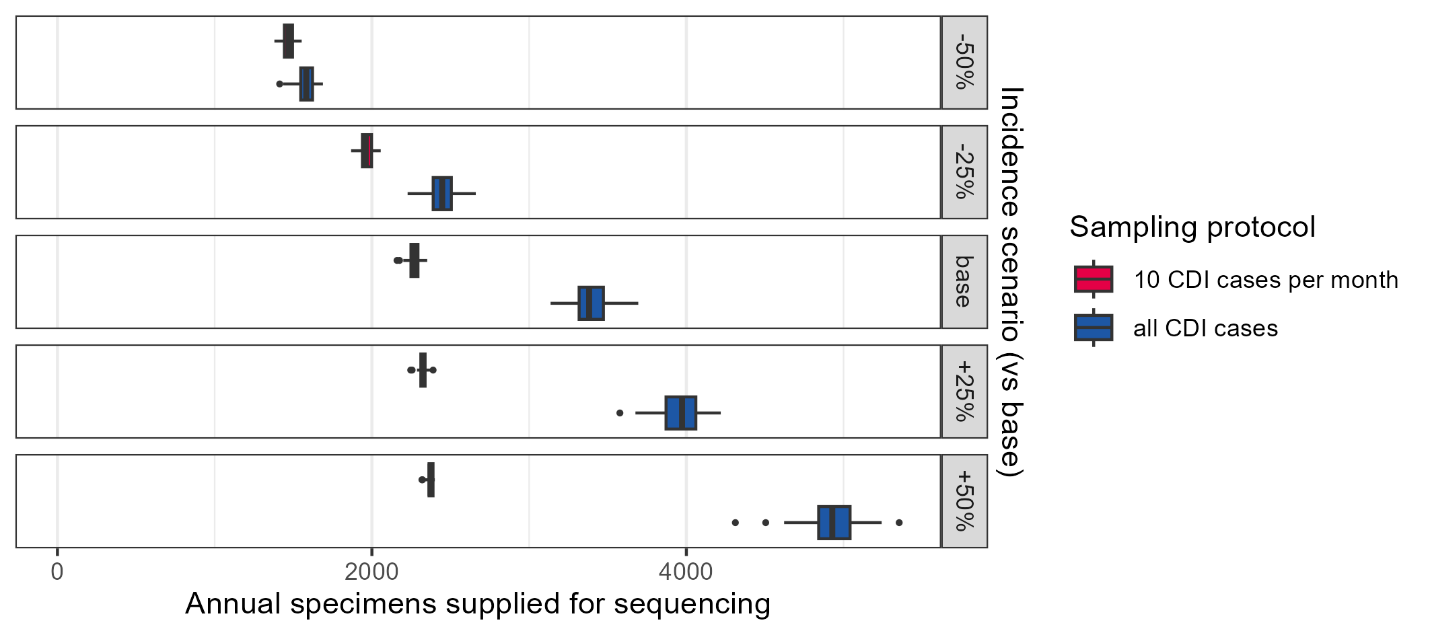 |

Supplementary Figure 1: Distribution of estimated annual sequenced specimens, supplied by 20‑member optimised sentinel sets, under candidate protocols for (a) base analysis and (b) incidence scenarios

Estimated cases by hospital group randomly drawn (n=100) from normal distributions centred on the 3‑year mean of reported cases.

*Note: (b) boxplots show (IQR), whiskers (in black) at 1.5 IQR and outliers*

| 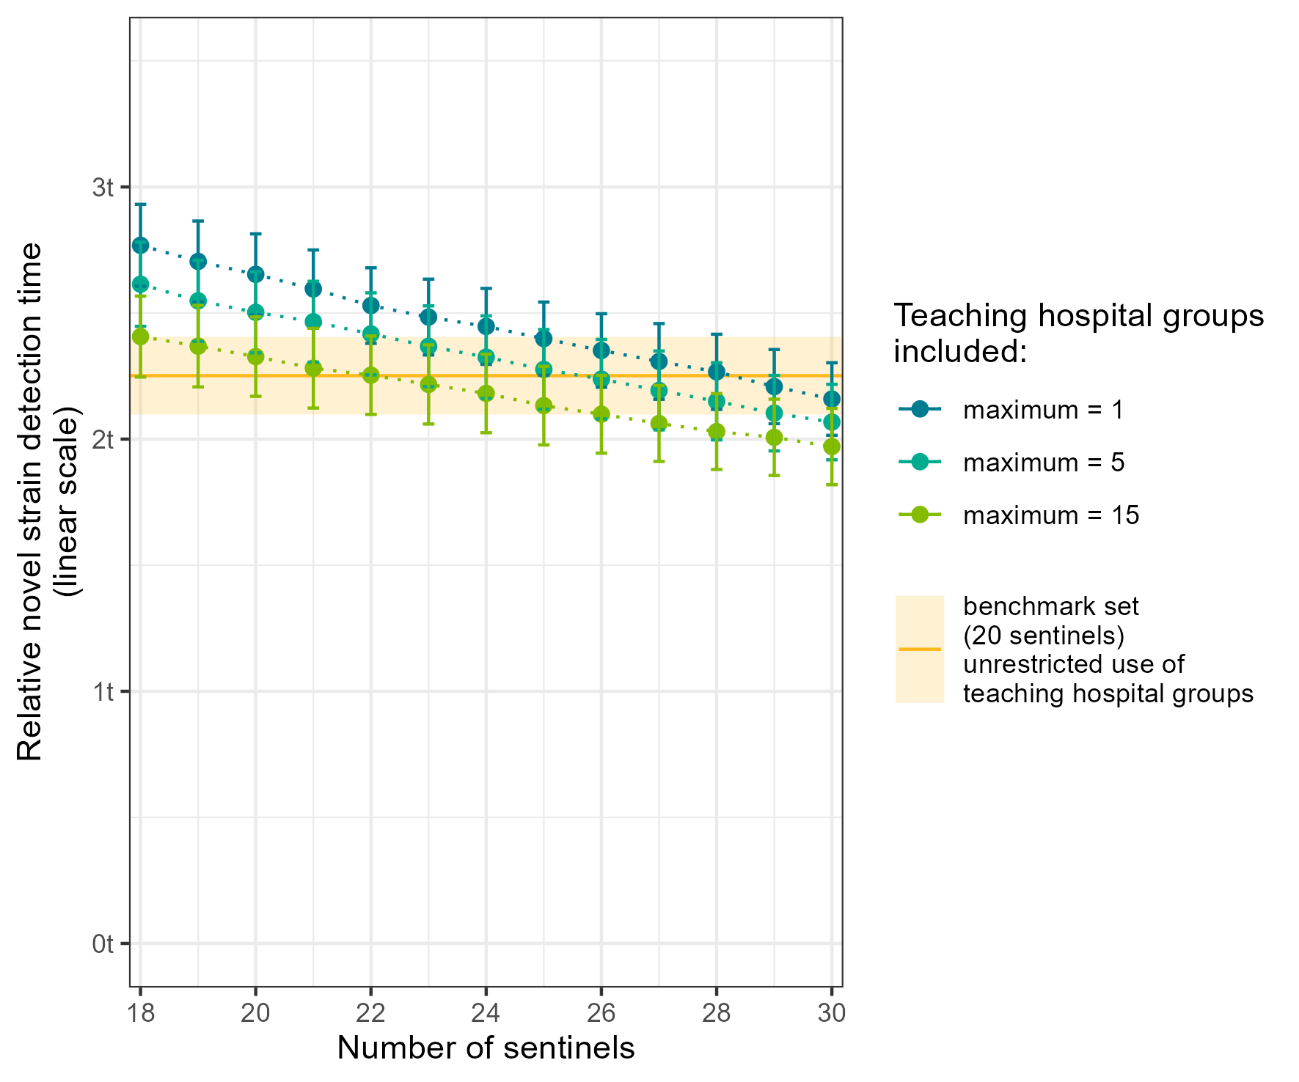 |
| --- |

Supplementary Figure 2: Impact of restricting the number of teaching hospital groups on the mean time to detection vs unrestricted use by the benchmark set (S0)

Detection time (mean +/-SD) by given size sentinel set taken from priority list obtained with a maximum of {15, 5, 1} teaching hospital groups used vs the benchmark 20-member sentinel set (S0) which has no restriction on teaching type use

| (a) | 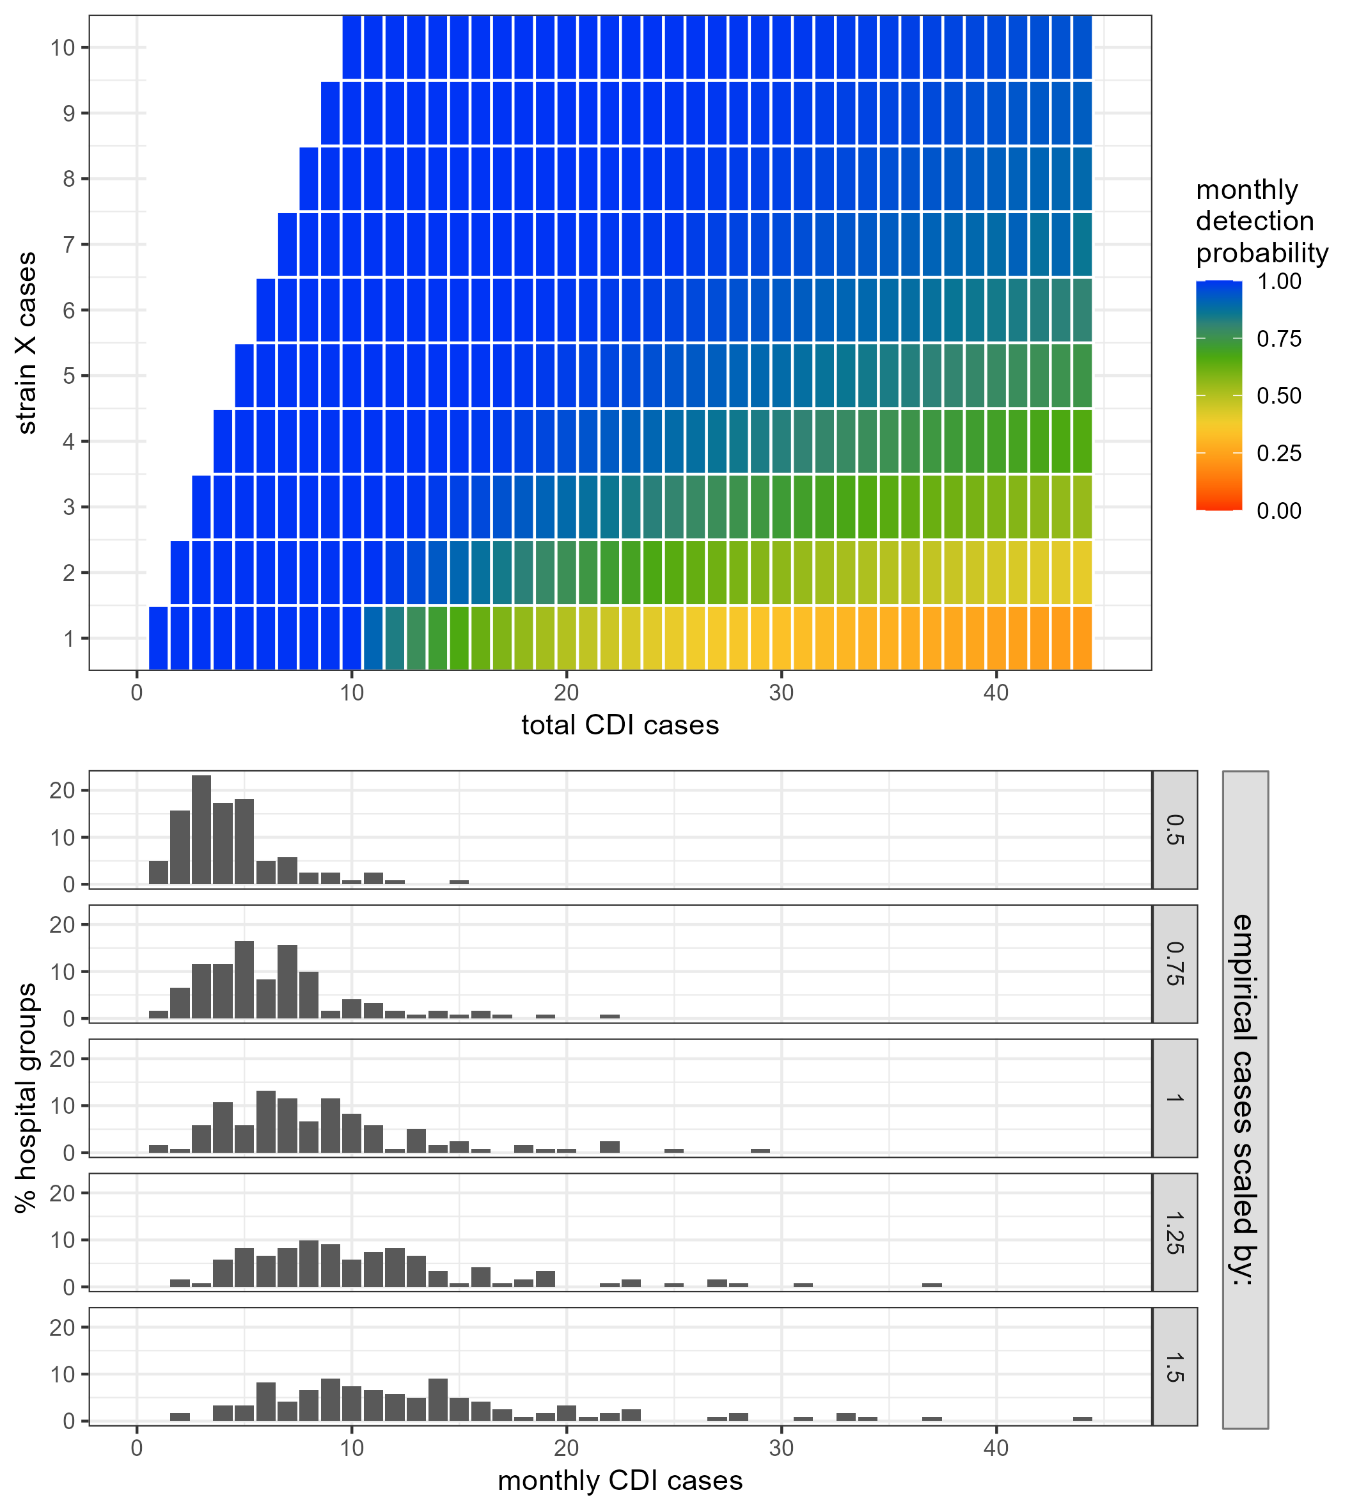 |
| --- | --- |
| (b) |

Supplementary Figure 3:

a) Probability of detection within a month: heat map by monthly CDI cases, strain X vs total

b) Histogram of monthly CDI cases per hospital group for each CDI total incidence scenario: empirical monthly CDI cases scaled by {0.5, 0.75, 1, 1.25, 1.50}
